# Supplementary material for: Efficient photocatalytic oxidation of CH4 over Ag-modified ZnO nanorods
Source: Royal Society of Chemistry journal article supplement (doi:10.1039/d3cy01629c), 2024-01-01
Supplement: d3cy01629c1.pdf [file d3cy01629c1.pdf]

## Supporting Information

### **Efficient photocatalytic oxidation of CH<sub>4</sub> over Ag-modified ZnO nanorods**

Chunlai Zhang,<sup>ab</sup> Yingdong Hao,<sup>ab</sup> Xingbo Wang,<sup>ab</sup> Deng Hu,<sup>a</sup> Nannan Sun<sup>\*ac</sup> and Wei Wei<sup>\*acd</sup>

<sup>a</sup> Photon Science Research Center for Carbon Dioxide, Shanghai Advanced Research Institute, Chinese Academy of Sciences, Shanghai, 201210, China. E-mail: sunnn@sari.ac.cn, weiwei@sari.ac.cn

<sup>b</sup> University of Chinese Academy of Sciences, Beijing, 100049, China

<sup>c</sup> CAS Key Lab of Low-Carbon Conversion Science and Engineering, Shanghai Advanced Research Institute, Chinese Academy of Sciences, Shanghai, 201210, China

<sup>d</sup> School of Physical Science and Technology, ShanghaiTech University, Shanghai, 201210, China

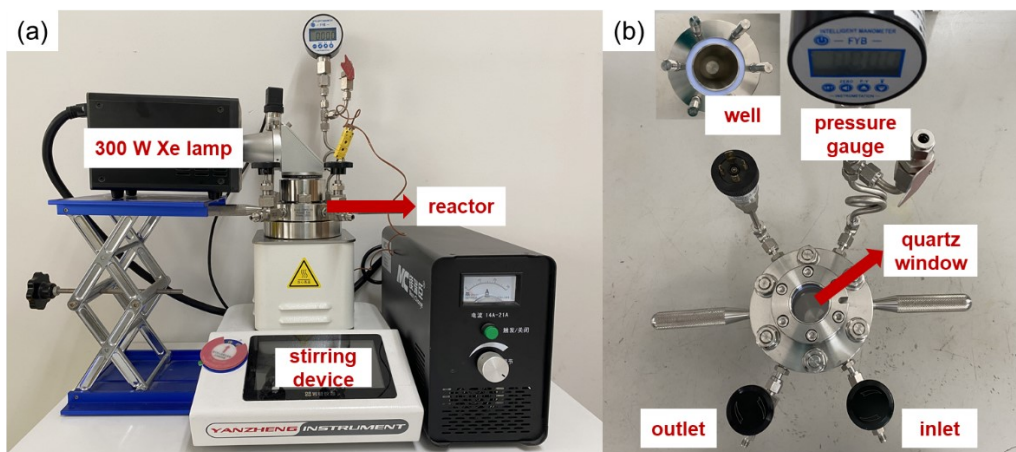

Fig. S1 Device diagram of photocatalytic conversion of methane experiments. (a) The simple indication of the light source, reactor, and stirring device; (b) Detail structure of the used reactor.

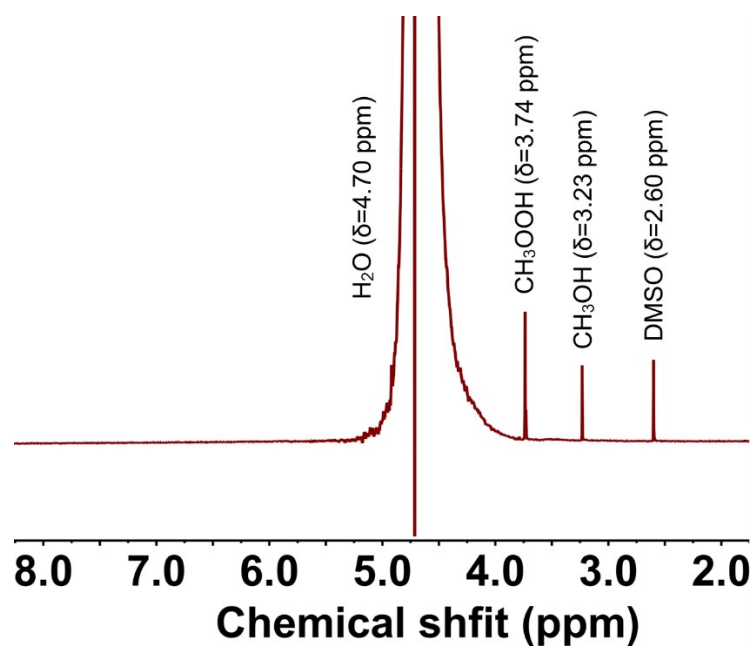

Fig. S2 <sup>1</sup>H NMR spectrum of the liquid product obtained from photocatalytic methane oxidation over 5.0Ag/r-ZnO. Reaction conditions: 1 mg catalyst, 75 mL H<sub>2</sub>O, 2 MPa CH<sub>4</sub>, 1 MPa O<sub>2</sub>, 8 h reaction time, 300 W Xe lamp. DMSO was adopted as an internal standard in the NMR test.

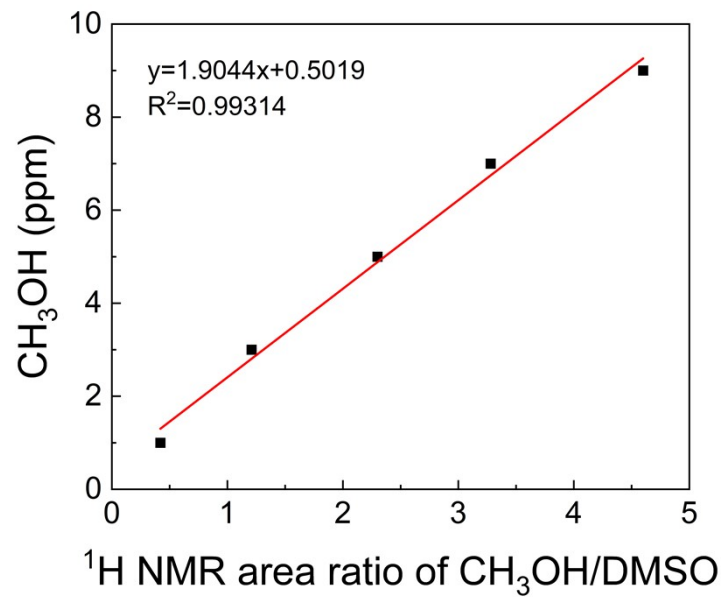

Fig. S3 Calibration curve for the quantification of CH<sub>3</sub>OH by <sup>1</sup>H NMR. There is no commercial product for CH<sub>3</sub>OOH. As the number of protons of methyl in CH<sub>3</sub>OH and CH<sub>3</sub>OOH molecules is the same, the quantification of CH<sub>3</sub>OOH is calibrated by the same curve as that of CH<sub>3</sub>OH, which is the usual way of quantifying CH<sub>3</sub>OOH.

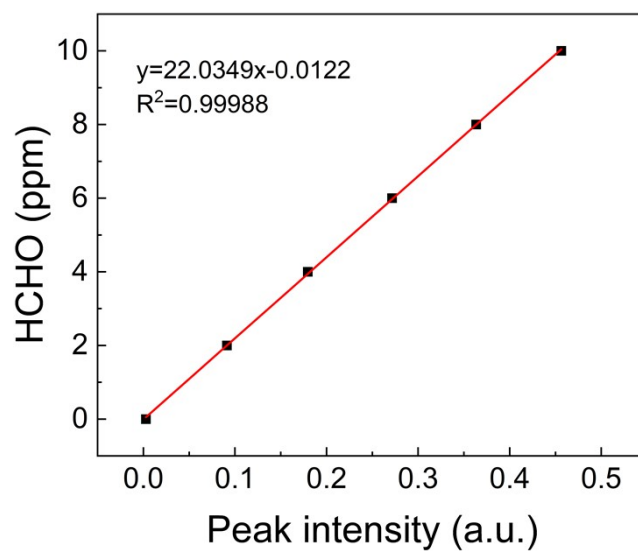

Fig. S4 Calibration curve for the quantification of HCHO by colorimetric method.

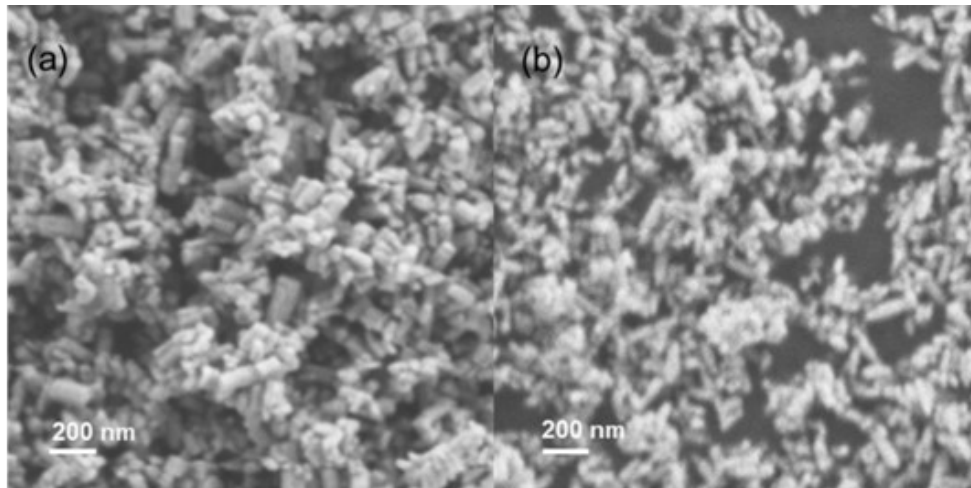

Fig. S5 FE-SEM images of r-ZnO.

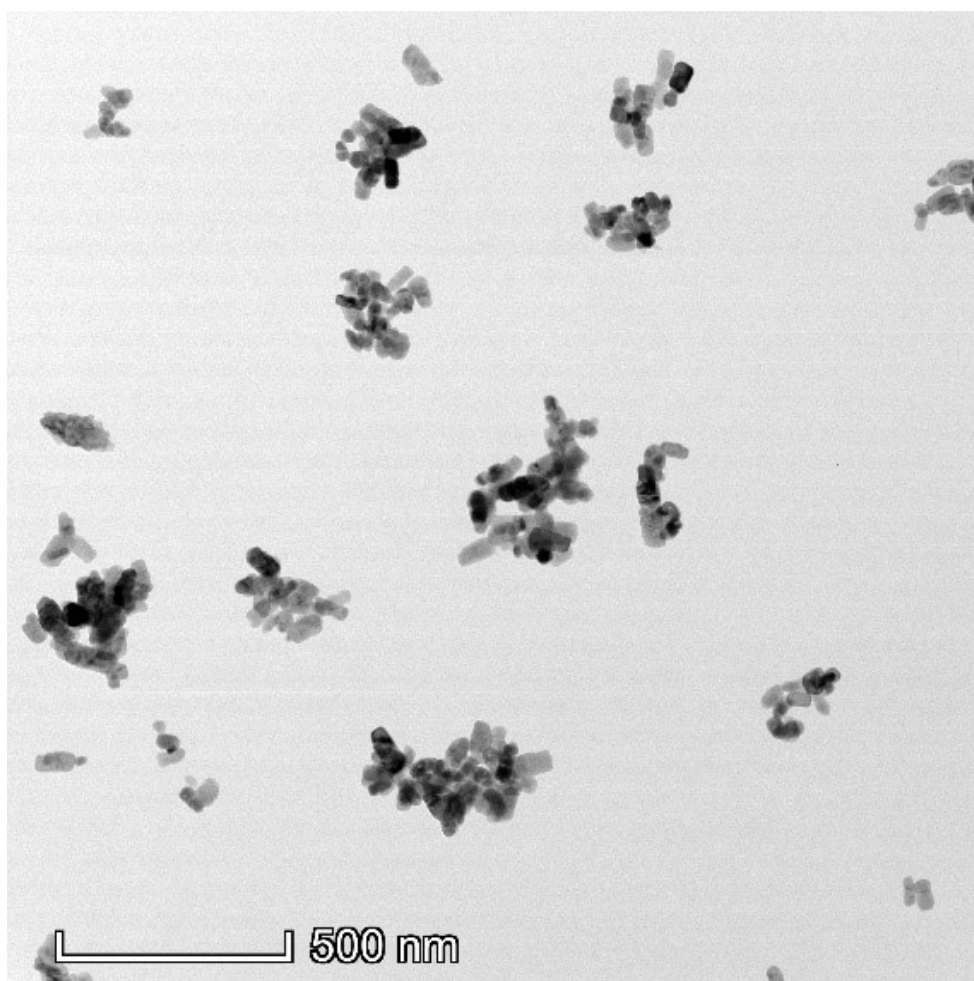

Fig. S6 TEM images of r-ZnO.

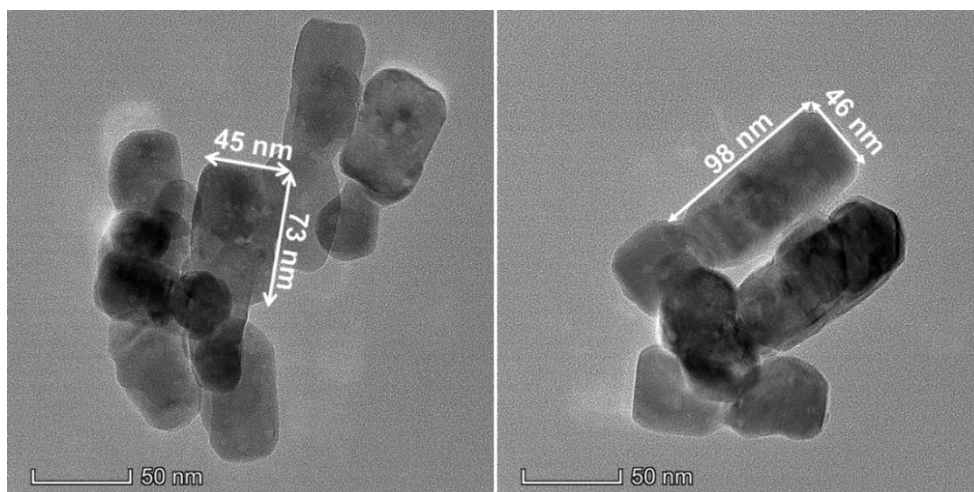

Fig. S7 TEM images of r-ZnO.



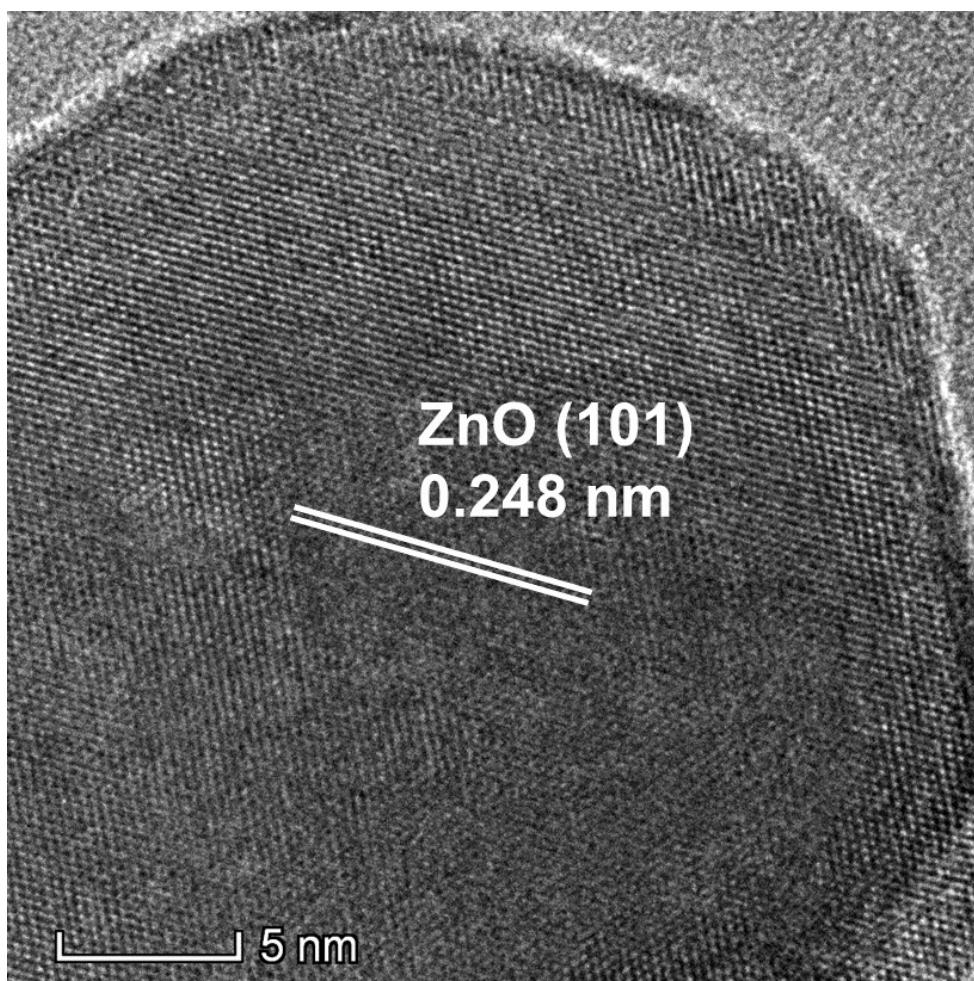

Fig. S8 HR-TEM images of r-ZnO.

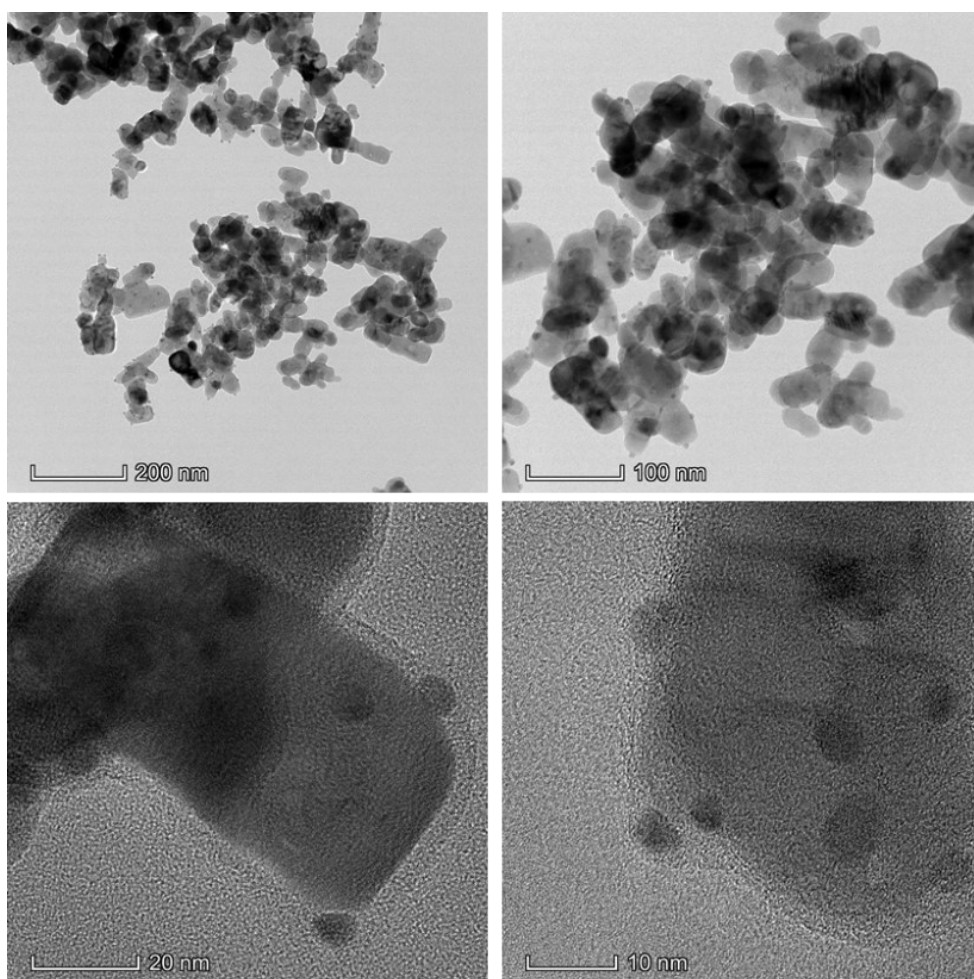

Fig. S9 TEM images of 5.0Ag/r-ZnO.

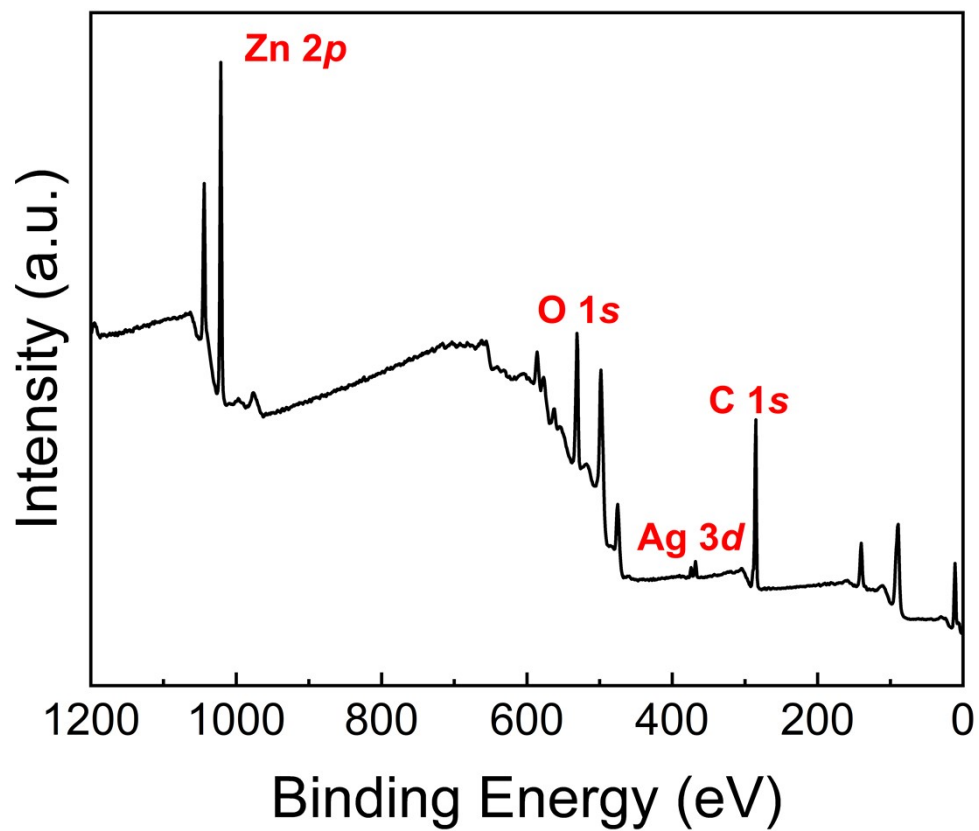

Fig. S10 XPS full survey spectra of 5.0Ag/r-ZnO.

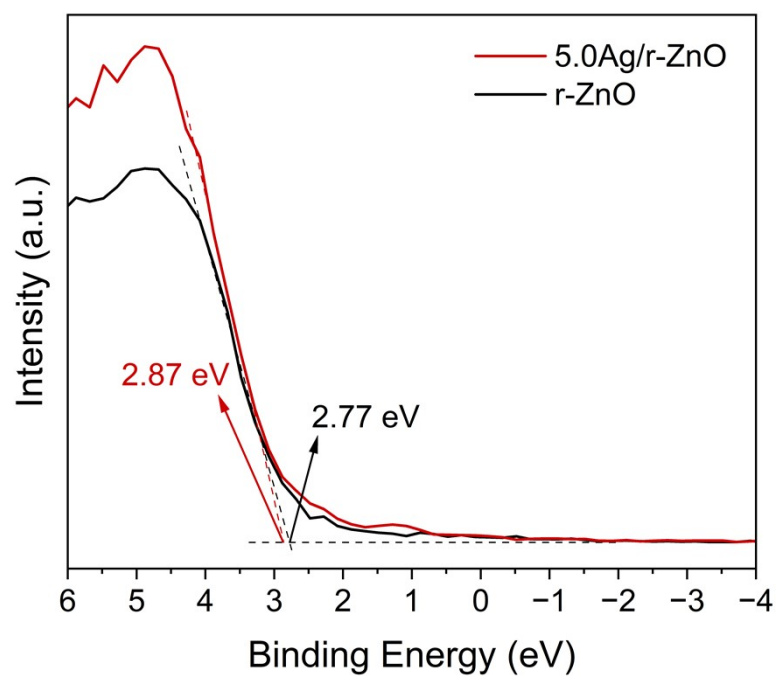

Fig. S11 XPS spectra at valence band regions of r-ZnO and 5.0Ag/r-ZnO.

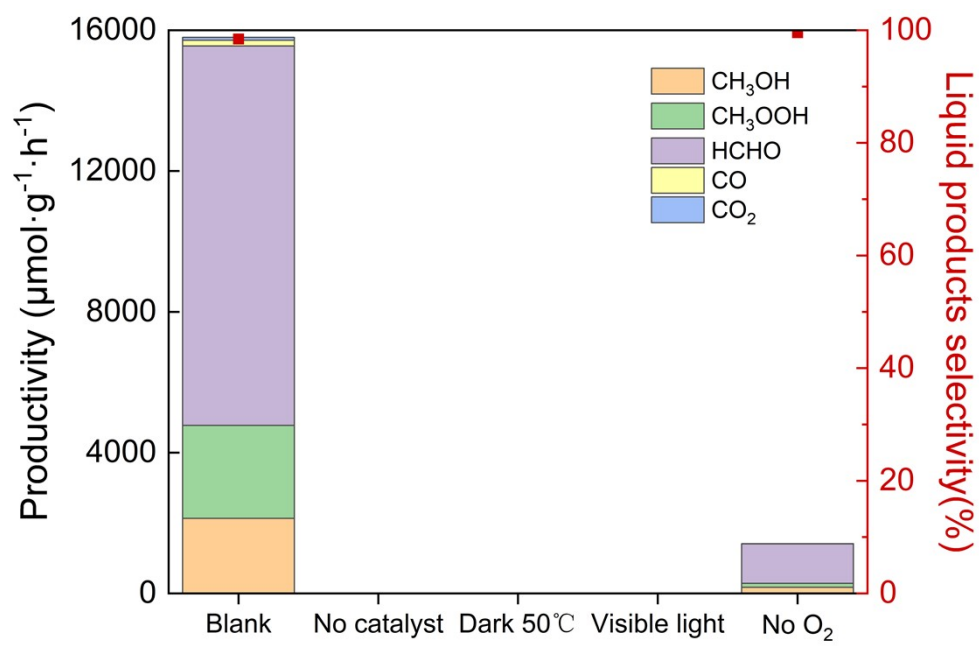

Fig. S12 Direct photocatalytic CH<sub>4</sub> oxidation to liquid products (Control).

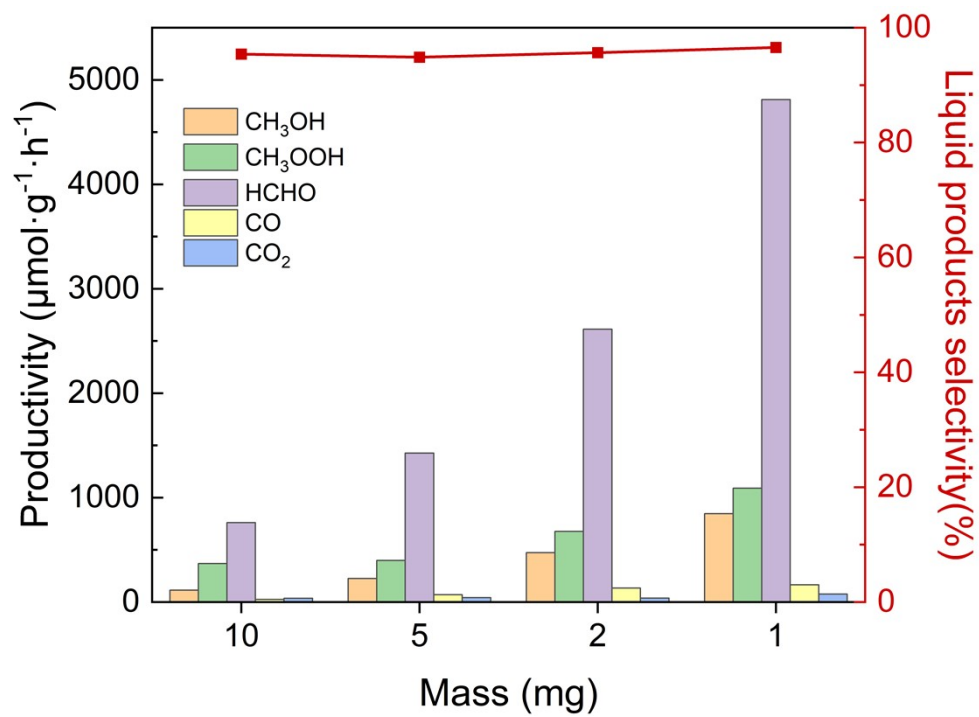

Fig. S13 Effect of catalyst mass on direct photocatalytic  $\text{CH}_4$  oxidation.

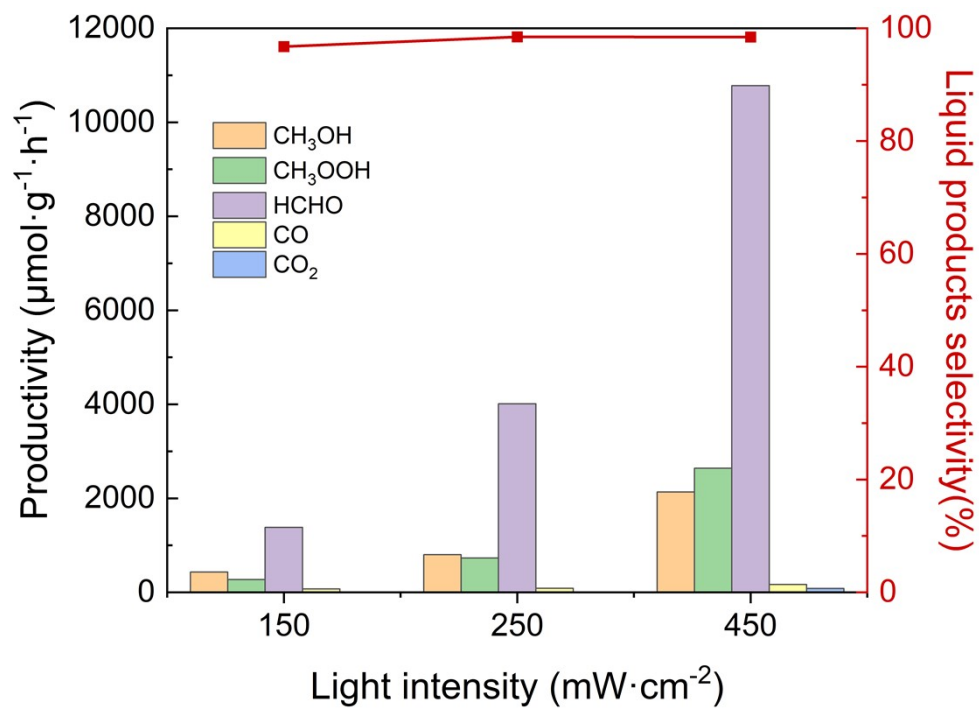

Fig. S14 Effect of light intensity on direct photocatalytic CH<sub>4</sub> oxidation.

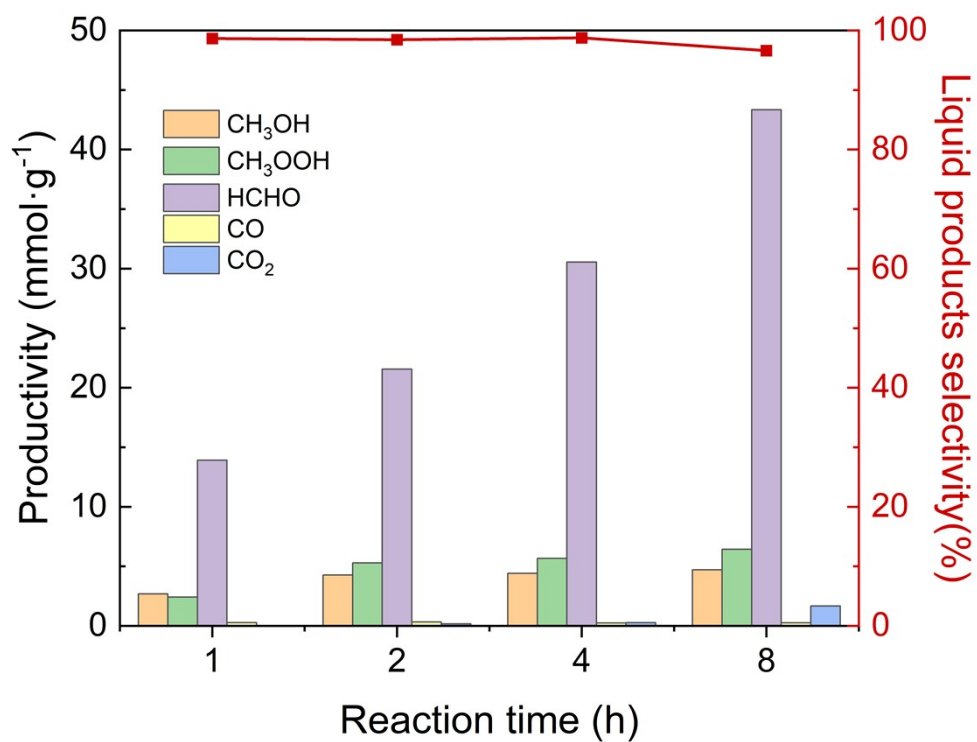

Fig. S15 Effect of reaction time on direct photocatalytic CH<sub>4</sub> oxidation.



Table S1 Comparison of photocatalytic performance of catalysts for CH<sub>4</sub> conversion to liquid oxygenates.

| Catalyst                    | Condition                                                                                                        | Oxidant        | Major Products                            | Productivity                                   | Selectively | Reference |
|-----------------------------|------------------------------------------------------------------------------------------------------------------|----------------|-------------------------------------------|------------------------------------------------|-------------|-----------|
| <b>5.0Ag/r-ZnO</b>          | Photocatalysis, 1 mg catalyst, 2 MPa CH <sub>4</sub> , 75 mL H <sub>2</sub> O, RT, 300 W Xe lamp, 2 h            | O <sub>2</sub> | HCHO                                      | 10778.92 μmol·g <sup>-1</sup> ·h <sup>-1</sup> | 68.23%      | This work |
| <b>TiO<sub>2</sub></b>      | Photocatalysis, 5 mg catalyst, 1.9 MPa CH <sub>4</sub> , 10 mL H <sub>2</sub> O, RT, 300 W Xe lamp, 1 h          | O <sub>2</sub> | HCHO                                      | 3.16 mmol g <sup>-1</sup> h <sup>-1</sup>      | 81.2%       | 1         |
| <b>AuFe-ZnO</b>             | Photocatalysis, 40 mg catalyst, 18 bar CH <sub>4</sub> , 20 mL H <sub>2</sub> O, 20 °C, 300 W Xe lamp, 1 h       | O <sub>2</sub> | CH <sub>3</sub> OH                        | 1365 μmol·g <sup>-1</sup> ·h <sup>-1</sup>     | 90.7%       | 2         |
| <b>Pd/ZnO</b>               | Photocatalysis, 10 mg catalyst, 2 MPa CH <sub>4</sub> , 100 mL H <sub>2</sub> O, 300 W Xe lamp, 25 ± 2 °C, 2 h,  | O <sub>2</sub> | HCHO                                      | 5515 μmol·g <sup>-1</sup> ·h <sup>-1</sup>     | 47.52%      | 3         |
| <b>AuCu-ZnO</b>             | Photocatalysis, 20 mg catalyst, 19 bar CH <sub>4</sub> , 100 mL H <sub>2</sub> O, 25 °C, 300 W Xe lamp, 2 h,     | O <sub>2</sub> | CH <sub>3</sub> OH<br>CH <sub>3</sub> OOH | 11224.9 μmol·g <sup>-1</sup> ·h <sup>-1</sup>  | 79.18%      | 4         |
| <b>Pd/H-TiO<sub>2</sub></b> | Photocatalysis, 10 mg catalyst, 2.0 MPa CH <sub>4</sub> , 60 mL H <sub>2</sub> O, 300 W Xe lamp, 45 °C, 2 h      | O <sub>2</sub> | CH <sub>3</sub> OH                        | 4.5 mmol g <sup>-1</sup> h <sup>-1</sup>       | 70%         | 5         |
| <b>Pd/WO<sub>3</sub></b>    | Photocatalysis, 20 mg catalyst, 1.9 MPa CH <sub>4</sub> , 100 mL H <sub>2</sub> O, 300 W Xe lamp, 25 ± 2 °C, 2 h | O <sub>2</sub> | CH <sub>3</sub> OH<br>CH <sub>3</sub> OOH | 7018 μmol·g <sup>-1</sup> ·h <sup>-1</sup>     | 81%         | 6         |

|                                           |                                                                                                                               |                |                                           |                                               |     |   |
|-------------------------------------------|-------------------------------------------------------------------------------------------------------------------------------|----------------|-------------------------------------------|-----------------------------------------------|-----|---|
| <b>Ag/TiO<sub>2</sub></b>                 | Photocatalysis,<br>10 mg catalyst,<br>2 MPa CH <sub>4</sub> ,<br>100 mL H <sub>2</sub> O,<br>300 W Xe lamp,<br>25 °C, 2 h     | O <sub>2</sub> | CH <sub>3</sub> OH                        | 4.8<br>mmol g <sup>-1</sup> h <sup>-1</sup>   | 80% | 7 |
| <b>Au-CoO<sub>x</sub>/TiO<sub>2</sub></b> | Photocatalysis,<br>10 mg catalyst,<br>2 MPa CH <sub>4</sub> ,<br>100 mL H <sub>2</sub> O,<br>300 W Xe lamp,<br>25 ± 2 °C, 2 h | O <sub>2</sub> | CH <sub>3</sub> OH<br>CH <sub>3</sub> OOH | 2540<br>μmol·g <sup>-1</sup> ·h <sup>-1</sup> | 95% | 8 |

## Reference

1. P.-P. Luo, X.-K. Zhou, Y. Li, and T.-B. Lu, *ACS Appl. Mater. Interfaces*, 2022, **14**, 21069-21078.
2. H. Du, X. Li, Z. Cao, S. Zhang, W. Yu, F. Sun, S. Wang, J. Zhao, J. Wang, Y. Bai, J. Yang, P. Yang, B. Jiang, and H. Li, *Appl. Catal. B*, 2023, **324**, 122291.
3. H. Song, X. Meng, S. Wang, W. Zhou, X. Wang, T. Kako and J. Ye, *J. Am. Chem. Soc.*, 2019, **141**, 20507-20515.
4. L. Luo, Z. Gong, Y. Xu, J. Ma, H. Liu, J. Xing and J. Tang, *J. Am. Chem. Soc.*, 2022, **144**, 740-750.
5. X. Zhang, Y. Wang, K. Chang, S. Yang, H. Liu, Q. Chen, Z. Xie, and Q. Kuang, *Appl. Catal. B*, 2023, **320**, 121961.
6. K. Wang, L. Luo, C. Wang and J. Tang, *Chinese J. Catal.*, 2023, **46**, 103-112.
7. N. Feng, H. Lin, H. Song, L. Yang, D. Tang, F. Deng and J. Ye, *Nat. Commun.*, 2021, **12**, 4652.
8. H. Song, X. Meng, S. Wang, W. Zhou, S. Song, T. Kako and J. Ye, *ACS Catal.*, 2020, **10**, 14318-14326.
